# Supplementary material for: Validation of Energy and Nutrition Intake in Japanese Elderly Individuals Estimated Based on a Short Food Frequency Questionnaire Compared against a 7-day Dietary Record: The Kyoto-Kameoka Study
Source: PubMed Central journal article supplement (PMC6471352; doi:10.3390/nu11030688), 2019-03-22
Supplement: nutrients-11-00688-s001.pdf [file nutrients-11-00688-s001.pdf]

**Table S1.** Comparison of daily energy and nutrient intake based on dietary records or a short food frequency questionnaire according to age-stratified groups in men.

| Nutrients                 | Unit    | <75 years (n = 47) |             |                     |             |                                  | ≥75 years (n = 31)  |        |      |    |                                  | p Value <sup>b</sup> |
|---------------------------|---------|--------------------|-------------|---------------------|-------------|----------------------------------|---------------------|--------|------|----|----------------------------------|----------------------|
|                           |         | 7-day DR           |             | FFQ                 |             | Difference <sup>a</sup><br>Ratio | 7-day DR            |        | FFQ  |    | Difference <sup>a</sup><br>Ratio |                      |
|                           |         | Mean               | SD          | Mean                | SD          |                                  | Mean                | SD     | Mean | SD |                                  |                      |
| Energy                    | (kcal)  | 2151 ± 288         | 1783 ± 568  | 0.88 (0.72 to 1.01) | 1946 ± 282  | 1985 ± 443                       | 1.05 (0.95 to 1.15) | <0.001 |      |    |                                  |                      |
| Protein                   | (g)     | 80.6 ± 12.1        | 55.2 ± 15.7 | 0.72 (0.57 to 0.83) | 72.0 ± 12.9 | 59.8 ± 16.3                      | 0.84 (0.72 to 0.97) | 0.004  |      |    |                                  |                      |
| Fat                       | (g)     | 60.6 ± 14.8        | 51.0 ± 15.7 | 0.84 (0.64 to 1.00) | 49.9 ± 12.8 | 50.6 ± 18.9                      | 0.96 (0.76 to 1.29) | 0.041  |      |    |                                  |                      |
| Carbohydrate              | (g)     | 291 ± 46           | 246 ± 108   | 0.92 (0.63 to 1.05) | 277 ± 43    | 294 ± 81                         | 1.07 (0.95 to 1.19) | <0.001 |      |    |                                  |                      |
| Protein <sup>c</sup>      | (%)     | 15.1 ± 1.6         | 12.9 ± 3.1  | 0.83 (0.72 to 0.96) | 14.8 ± 1.6  | 12.0 ± 1.8                       | 0.82 (0.73 to 0.92) | 0.646  |      |    |                                  |                      |
| Fat <sup>c</sup>          | (%)     | 25.3 ± 4.9         | 28.5 ± 12.2 | 1.04 (0.76 to 1.46) | 23.0 ± 4.7  | 23.5 ± 9.0                       | 0.94 (0.77 to 1.17) | 0.574  |      |    |                                  |                      |
| Carbohydrate <sup>c</sup> | (%)     | 54.2 ± 5.5         | 52.1 ± 11.9 | 1.02 (0.88 to 1.12) | 57.2 ± 6.2  | 58.4 ± 7.8                       | 1.04 (0.93 to 1.12) | 0.432  |      |    |                                  |                      |
| SFA                       | (g)     | 15.1 ± 4.6         | 12.1 ± 3.6  | 0.83 (0.66 to 0.93) | 12.6 ± 3.8  | 11.7 ± 3.0                       | 0.96 (0.69 to 1.22) | 0.026  |      |    |                                  |                      |
| MUFA                      | (g)     | 19.2 ± 5.2         | 18.8 ± 6.6  | 0.91 (0.75 to 1.24) | 15.7 ± 4.0  | 19.6 ± 7.8                       | 1.07 (0.87 to 1.66) | 0.039  |      |    |                                  |                      |
| PUFA                      | (g)     | 14.2 ± 4.1         | 16.3 ± 5.4  | 1.14 (0.86 to 1.52) | 11.7 ± 3.3  | 17.4 ± 6.4                       | 1.40 (1.14 to 2.08) | 0.020  |      |    |                                  |                      |
| n-6 PUFA                  | (g)     | 11.7 ± 3.7         | 14.3 ± 5.1  | 1.25 (0.88 to 1.67) | 9.4 ± 2.9   | 15.5 ± 6.3                       | 1.52 (1.16 to 2.23) | 0.012  |      |    |                                  |                      |
| n-3 PUFA                  | (g)     | 2.5 ± 0.7          | 2.3 ± 0.7   | 0.95 (0.71 to 1.30) | 2.2 ± 0.7   | 2.5 ± 1.1                        | 1.13 (0.76 to 1.33) | 0.181  |      |    |                                  |                      |
| MO n-3 PUFA <sup>d</sup>  | (g)     | 0.9 ± 0.5          | 0.5 ± 0.2   | 0.67 (0.40 to 1.01) | 0.8 ± 0.5   | 0.5 ± 0.2                        | 0.59 (0.43 to 1.48) | 0.554  |      |    |                                  |                      |
| Cholesterol               | (mg)    | 366 ± 115          | 214 ± 55    | 0.59 (0.46 to 0.75) | 319 ± 110   | 216 ± 49                         | 0.70 (0.57 to 0.79) | 0.038  |      |    |                                  |                      |
| Iron                      | (mg)    | 8.9 ± 2.2          | 6.4 ± 1.8   | 0.76 (0.62 to 0.89) | 7.9 ± 1.6   | 7.3 ± 1.4                        | 0.95 (0.74 to 1.10) | <0.001 |      |    |                                  |                      |
| Calcium                   | (mg)    | 554 ± 172          | 562 ± 201   | 1.01 (0.87 to 1.21) | 484 ± 193   | 504 ± 149                        | 1.10 (0.85 to 1.42) | 0.275  |      |    |                                  |                      |
| Carotene                  | (μg)    | 3975 ± 2986        | 2624 ± 867  | 0.78 (0.51 to 1.11) | 3112 ± 2009 | 2640 ± 761                       | 0.89 (0.64 to 1.56) | 0.153  |      |    |                                  |                      |
| Vitamin A <sup>e</sup>    | (μg RE) | 643 ± 666          | 1078 ± 702  | 1.82 (1.26 to 2.83) | 451 ± 188   | 862 ± 531                        | 1.51 (1.16 to 2.89) | 0.752  |      |    |                                  |                      |
| Vitamin D                 | (μg)    | 9.2 ± 4.3          | 4.6 ± 1.6   | 0.53 (0.36 to 0.70) | 7.9 ± 5.4   | 5.0 ± 2.6                        | 0.77 (0.38 to 1.42) | 0.098  |      |    |                                  |                      |
| α-tocopherol              | (mg)    | 8.5 ± 2.4          | 10.2 ± 2.7  | 1.25 (0.96 to 1.51) | 7.0 ± 1.9   | 10.8 ± 3.5                       | 1.47 (1.27 to 1.99) | 0.006  |      |    |                                  |                      |
| Vitamin B1                | (mg)    | 1.02 ± 0.21        | 0.65 ± 0.14 | 0.63 (0.58 to 0.70) | 0.90 ± 0.23 | 0.67 ± 0.14                      | 0.74 (0.56 to 0.97) | 0.022  |      |    |                                  |                      |
| Vitamin B2                | (mg)    | 1.25 ± 0.29        | 1.07 ± 0.38 | 0.84 (0.69 to 0.99) | 1.08 ± 0.29 | 1.06 ± 0.27                      | 0.95 (0.83 to 1.22) | 0.014  |      |    |                                  |                      |
| Folate                    | (μg)    | 358 ± 120          | 313 ± 82    | 0.89 (0.77 to 1.13) | 304 ± 101   | 328 ± 87                         | 0.92 (0.81 to 1.47) | 0.045  |      |    |                                  |                      |
| Vitamin C                 | (mg)    | 130 ± 75           | 91 ± 30     | 0.84 (0.54 to 0.97) | 109 ± 62    | 107 ± 36                         | 1.03 (0.70 to 1.55) | 0.008  |      |    |                                  |                      |
| SDF                       | (g)     | 3.3 ± 1.1          | 2.1 ± 0.7   | 0.64 (0.46 to 0.83) | 2.9 ± 0.9   | 2.2 ± 0.6                        | 0.79 (0.62 to 0.98) | 0.010  |      |    |                                  |                      |
| IDF                       | (g)     | 11.3 ± 3.5         | 8.5 ± 2.6   | 0.73 (0.60 to 0.97) | 10.1 ± 2.4  | 8.3 ± 2.2                        | 0.78 (0.65 to 1.01) | 0.397  |      |    |                                  |                      |
| TDF                       | (g)     | 15.6 ± 4.7         | 11.4 ± 3.7  | 0.71 (0.56 to 0.95) | 14.1 ± 3.2  | 11.6 ± 2.9                       | 0.81 (0.68 to 0.92) | 0.159  |      |    |                                  |                      |
| Median                    |         |                    |             | 0.84 (0.72 to 1.01) |             |                                  | 0.95 (0.81 to 1.07) | 0.064  |      |    |                                  |                      |

Abbreviations: DR, dietary record; FFQ, food frequency questionnaire; IDF, insoluble dietary fiber; MO n-3 PUFA, marine origin n-3 PUFA; MUFA, monounsaturated fatty acids; PUFA, polyunsaturated fatty acids; SD, standard deviation; SDF, soluble dietary fiber; SFA, saturated fatty acids; TDF, total dietary fiber. <sup>a</sup> Difference = (FFQ / 7-day DR). The ratios are shown median (interquartile range). <sup>b</sup> The Mann-Whitney U test was used to compare measurement error

between participants aged <75 and ≥75 years. Bold values are statistically significant ( $p < 0.05$ ). <sup>c</sup> Value are shown as energy-dense macronutrient (% energy intake).  
<sup>d</sup> Sum of eicosapentaenoic acid (20:5), docosapentaenoic acid (22:5), and docosahexaenoic acid (22:6). <sup>e</sup> Sum of retinol, β-carotene/12, α-carotene/24, and cryptoxanthin/24.

**Table S2.** Comparison of daily energy and nutrient intake based on dietary records or a short food frequency questionnaire according to age-stratified groups in women.

| Nutrients                 | Unit    | <75 years ( $n = 43$ ) |             |      |                |                         |             | ≥75 years ( $n = 22$ ) |                |       |       |                         |  | $p$ Value <sup>b</sup> |
|---------------------------|---------|------------------------|-------------|------|----------------|-------------------------|-------------|------------------------|----------------|-------|-------|-------------------------|--|------------------------|
|                           |         | 7-day DR               |             | FFQ  |                | Difference <sup>a</sup> |             | 7-day DR               |                | FFQ   |       | Difference <sup>a</sup> |  |                        |
|                           |         | Mean                   | SD          | Mean | SD             | Ratio                   | Mean        | SD                     | Mean           | SD    | Ratio | Ratio                   |  |                        |
| Energy                    | (kcal)  | 1779 ± 210             | 1543 ± 398  | 0.87 | (0.77 to 0.99) | 1813 ± 243              | 1601 ± 199  | 0.86                   | (0.80 to 0.99) | 0.613 |       |                         |  |                        |
| Protein                   | (g)     | 69.1 ± 11.1            | 52.0 ± 14.1 | 0.74 | (0.61 to 0.87) | 69.7 ± 10.5             | 54.5 ± 11.5 | 0.81                   | (0.68 to 0.91) | 0.335 |       |                         |  |                        |
| Fat                       | (g)     | 52.6 ± 12.5            | 52.0 ± 17.2 | 1.05 | (0.69 to 1.29) | 51.3 ± 10.0             | 54.6 ± 16.8 | 1.05                   | (0.86 to 1.30) | 0.425 |       |                         |  |                        |
| Carbohydrate              | (g)     | 253 ± 35               | 213 ± 67    | 0.86 | (0.71 to 0.99) | 261 ± 36                | 222 ± 32    | 0.84                   | (0.78 to 0.91) | 0.961 |       |                         |  |                        |
| Protein <sup>c</sup>      | (%)     | 15.6 ± 1.9             | 13.7 ± 2.4  | 0.86 | (0.78 to 0.97) | 15.4 ± 1.1              | 13.6 ± 2.3  | 0.91                   | (0.74 to 1.01) | 0.884 |       |                         |  |                        |
| Fat <sup>c</sup>          | (%)     | 26.6 ± 4.8             | 31.1 ± 9.2  | 1.13 | (0.87 to 1.48) | 25.5 ± 3.6              | 30.7 ± 8.7  | 1.15                   | (0.99 to 1.47) | 0.672 |       |                         |  |                        |
| Carbohydrate <sup>c</sup> | (%)     | 56.9 ± 5.2             | 54.4 ± 7.2  | 0.97 | (0.89 to 1.06) | 57.7 ± 3.6              | 55.5 ± 5.4  | 0.95                   | (0.89 to 1.02) | 0.528 |       |                         |  |                        |
| SFA                       | (g)     | 13.2 ± 3.7             | 11.9 ± 2.6  | 0.95 | (0.71 to 1.18) | 13.1 ± 3.5              | 12.9 ± 3.3  | 1.06                   | (0.86 to 1.25) | 0.190 |       |                         |  |                        |
| MUFA                      | (g)     | 16.6 ± 4.6             | 19.9 ± 7.0  | 1.22 | (0.84 to 1.56) | 16.2 ± 4.2              | 20.0 ± 6.7  | 1.19                   | (1.00 to 1.54) | 0.787 |       |                         |  |                        |
| PUFA                      | (g)     | 12.0 ± 2.7             | 16.6 ± 6.6  | 1.34 | (1.07 to 1.71) | 11.6 ± 2.6              | 16.8 ± 5.9  | 1.37                   | (1.02 to 2.13) | 0.672 |       |                         |  |                        |
| n-6 PUFA                  | (g)     | 9.7 ± 2.4              | 14.6 ± 6.1  | 1.53 | (1.10 to 1.85) | 9.3 ± 2.3               | 15.0 ± 5.5  | 1.52                   | (1.22 to 2.42) | 0.425 |       |                         |  |                        |
| n-3 PUFA                  | (g)     | 2.2 ± 0.7              | 2.4 ± 0.9   | 1.06 | (0.87 to 1.42) | 2.2 ± 0.6               | 2.4 ± 0.9   | 1.00                   | (0.83 to 1.45) | 0.613 |       |                         |  |                        |
| MO n-3 PUFA <sup>d</sup>  | (g)     | 0.8 ± 0.5              | 0.5 ± 0.2   | 0.78 | (0.48 to 1.06) | 0.8 ± 0.4               | 0.5 ± 0.2   | 0.59                   | (0.42 to 0.96) | 0.328 |       |                         |  |                        |
| Cholesterol               | (mg)    | 311 ± 85               | 240 ± 100   | 0.68 | (0.56 to 0.91) | 303 ± 98                | 258 ± 127   | 0.77                   | (0.53 to 1.18) | 0.537 |       |                         |  |                        |
| Iron                      | (mg)    | 8.2 ± 2.1              | 7.1 ± 2.4   | 0.82 | (0.59 to 1.08) | 8.1 ± 1.5               | 7.0 ± 1.8   | 0.87                   | (0.72 to 1.03) | 0.632 |       |                         |  |                        |
| Calcium                   | (mg)    | 553 ± 164              | 556 ± 183   | 1.03 | (0.79 to 1.21) | 519 ± 159               | 556 ± 139   | 1.01                   | (0.92 to 1.34) | 0.442 |       |                         |  |                        |
| Carotene                  | (μg)    | 4159 ± 3029            | 2311 ± 628  | 0.64 | (0.44 to 0.96) | 4153 ± 1877             | 2327 ± 740  | 0.58                   | (0.43 to 0.82) | 0.467 |       |                         |  |                        |
| Vitamin A <sup>e</sup>    | (μg RE) | 622 ± 462              | 839 ± 351   | 1.44 | (1.09 to 2.08) | 562 ± 211               | 1145 ± 909  | 1.44                   | (1.07 to 3.26) | 0.613 |       |                         |  |                        |
| Vitamin D                 | (μg)    | 9.8 ± 5.2              | 4.4 ± 1.5   | 0.46 | (0.35 to 0.71) | 9.4 ± 3.5               | 4.2 ± 1.8   | 0.43                   | (0.34 to 0.60) | 0.575 |       |                         |  |                        |
| α-tocopherol              | (mg)    | 7.8 ± 2.2              | 10.4 ± 3.8  | 1.27 | (1.00 to 1.61) | 7.6 ± 1.6               | 10.8 ± 3.3  | 1.34                   | (1.10 to 1.90) | 0.371 |       |                         |  |                        |
| Vitamin B1                | (mg)    | 0.93 ± 0.24            | 0.69 ± 0.12 | 0.76 | (0.61 to 0.92) | 0.91 ± 0.19             | 0.67 ± 0.10 | 0.69                   | (0.62 to 0.94) | 0.873 |       |                         |  |                        |
| Vitamin B2                | (mg)    | 1.14 ± 0.25            | 1.14 ± 0.35 | 0.96 | (0.79 to 1.25) | 1.16 ± 0.25             | 1.27 ± 0.31 | 1.02                   | (0.91 to 1.28) | 0.210 |       |                         |  |                        |
| Folate                    | (μg)    | 346 ± 103              | 334 ± 110   | 1.02 | (0.70 to 1.24) | 342 ± 83                | 390 ± 122   | 1.14                   | (0.90 to 1.35) | 0.126 |       |                         |  |                        |
| Vitamin C                 | (mg)    | 136 ± 62               | 109 ± 45    | 0.85 | (0.53 to 1.08) | 138 ± 54                | 126 ± 42    | 0.94                   | (0.65 to 1.22) | 0.247 |       |                         |  |                        |
| SDF                       | (g)     | 3.1 ± 0.8              | 2.0 ± 0.6   | 0.63 | (0.48 to 0.80) | 2.9 ± 0.5               | 2.0 ± 0.5   | 0.70                   | (0.53 to 0.87) | 0.510 |       |                         |  |                        |
| IDF                       | (g)     | 10.9 ± 2.9             | 8.0 ± 2.1   | 0.74 | (0.61 to 0.91) | 10.5 ± 1.6              | 7.9 ± 2.0   | 0.76                   | (0.58 to 0.93) | 1.000 |       |                         |  |                        |
| TDF                       | (g)     | 14.9 ± 3.8             | 10.9 ± 3.0  | 0.68 | (0.60 to 0.93) | 14.3 ± 2.0              | 10.4 ± 2.5  | 0.71                   | (0.59 to 0.90) | 0.939 |       |                         |  |                        |
| Median                    |         |                        |             | 0.87 | (0.77 to 0.99) |                         |             | 0.86                   | (0.80 to 0.99) | 0.613 |       |                         |  |                        |

Abbreviations: DR, dietary record; FFQ, food frequency questionnaire; IDF, insoluble dietary fiber; MO n-3 PUFA, marine origin n-3 PUFA; MUFA, monounsaturated fatty acids; PUFA, polyunsaturated fatty acids; SD, standard deviation; SDF, soluble dietary fiber; SFA, saturated fatty acids; TDF, total dietary fiber. <sup>a</sup> Difference = (FFQ / 7-day DR). The ratios are shown median (interquartile range). <sup>b</sup> The Mann-Whitney U test was used to compare measurement error between participants aged <75 and ≥75 years. Bold values are statistically significant ( $p < 0.05$ ). <sup>c</sup> Value are shown as energy-dense macronutrient (% energy intake). <sup>d</sup> Sum of eicosapentaenoic acid (20:5), docosapentaenoic acid (22:5), and docosahexaenoic acid (22:6). <sup>e</sup> Sum of retinol, β-carotene/12, α-carotene/24, and cryptoxanthin/24.

**Table S3.** The coefficients of variation, and within- to between-person variance ratios of energy and nutrient intake based on dietary record (DR), shown per sex <sup>a</sup>.

|                           | Women ( <i>n</i> = 65)           |                                  |                 | Men ( <i>n</i> = 78)             |                                  |                 |
|---------------------------|----------------------------------|----------------------------------|-----------------|----------------------------------|----------------------------------|-----------------|
|                           | CV <sub>w</sub> (%) <sup>a</sup> | CV <sub>b</sub> (%) <sup>b</sup> | VR <sup>c</sup> | CV <sub>w</sub> (%) <sup>a</sup> | CV <sub>b</sub> (%) <sup>b</sup> | VR <sup>c</sup> |
| Energy                    | 13.1                             | 12.0                             | 1.09            | 15.3                             | 14.8                             | 1.03            |
| Protein                   | 17.9                             | 14.9                             | 1.20            | 19.5                             | 17.0                             | 1.15            |
| Fat                       | 28.6                             | 24.1                             | 1.19            | 32.6                             | 26.6                             | 1.23            |
| Carbohydrate              | 15.0                             | 13.1                             | 1.15            | 15.6                             | 16.1                             | 0.97            |
| Protein <sup>b</sup>      | 15.5                             | 10.6                             | 1.45            | 14.5                             | 10.8                             | 1.35            |
| Fat <sup>b</sup>          | 21.6                             | 17.9                             | 1.21            | 23.8                             | 20.4                             | 1.17            |
| Carbohydrate <sup>b</sup> | 10.5                             | 8.1                              | 1.30            | 12.0                             | 10.6                             | 1.13            |
| SFA                       | 35.2                             | 29.7                             | 1.19            | 37.2                             | 31.8                             | 1.17            |
| MUFA                      | 37.3                             | 29.5                             | 1.26            | 40.7                             | 28.5                             | 1.43            |
| PUFA                      | 32.5                             | 23.2                             | 1.40            | 37.2                             | 30.1                             | 1.24            |
| n-6 PUFA                  | 33.9                             | 24.5                             | 1.39            | 39.1                             | 33.3                             | 1.17            |
| n-3 PUFA                  | 48.1                             | 32.8                             | 1.47            | 48.6                             | 30.0                             | 1.62            |
| MO n-3 PUFA <sup>c</sup>  | 105.7                            | 65.6                             | 1.61            | 93.7                             | 57.7                             | 1.62            |
| Cholesterol               | 51.5                             | 28.6                             | 1.80            | 46.3                             | 33.1                             | 1.40            |
| Iron                      | 24.4                             | 22.1                             | 1.10            | 23.4                             | 24.3                             | 0.96            |
| Calcium                   | 30.8                             | 27.8                             | 1.11            | 30.6                             | 34.9                             | 0.88            |
| Carotene                  | 55.6                             | 59.7                             | 0.93            | 67.3                             | 68.6                             | 0.98            |
| Vitamin A <sup>d</sup>    | 42.6                             | 75.2                             | 0.57            | 51.2                             | 94.9                             | 0.54            |
| Vitamin D                 | 94.6                             | 52.3                             | 1.81            | 84.9                             | 54.6                             | 1.56            |
| α-tocopherol              | 29.7                             | 25.4                             | 1.17            | 33.1                             | 29.5                             | 1.12            |
| Vitamin B1                | 29.1                             | 23.5                             | 1.24            | 31.4                             | 23.2                             | 1.35            |
| Vitamin B2                | 24.7                             | 20.2                             | 1.22            | 22.7                             | 25.7                             | 0.88            |
| Folate                    | 25.3                             | 26.6                             | 0.95            | 29.4                             | 34.4                             | 0.85            |
| Vitamin C                 | 44.7                             | 42.3                             | 1.06            | 47.0                             | 58.2                             | 0.81            |
| SDF                       | 29.8                             | 25.4                             | 1.17            | 31.1                             | 34.9                             | 0.89            |
| IDF                       | 25.4                             | 23.8                             | 1.07            | 25.8                             | 29.9                             | 0.86            |
| TDF                       | 24.3                             | 21.6                             | 1.13            | 24.9                             | 28.3                             | 0.88            |

Abbreviations: CV<sub>w</sub>, coefficient of within-person variation; CV<sub>b</sub>, coefficient of between-person variation; IDF, insoluble dietary fiber; MO n-3 PUFA, marine origin n-3 PUFA; MUFA, monounsaturated fatty acids; PUFA, polyunsaturated fatty acids; SDF, soluble dietary fiber; SFA, saturated fatty acids; TDF, total dietary fiber; VR, ratio of within- to between-person variance. <sup>a</sup> The between-person variance ( $\sigma_b^2$ ) and within-person variance ( $\sigma_w^2$ ) for intake were calculated using one-way analysis of variance. <sup>b</sup> Value are shown as energy-dense macronutrient (% energy intake). <sup>c</sup> Sum of eicosapentaenoic acid (20:5), docosapentaenoic acid (22:5), and docosahexaenoic acid (22:6). <sup>d</sup> Sum of retinol, β-carotene/12, α-carotene/24, and cryptoxanthin/24.

**Table S4.** Group size required to ensure accuracy of energy and nutrients intake with 95% confidence interval (CI) within the specified % deviation ( $D_0$ ) of a group's mean from the group's usual ("true") mean intake based on dietary record (DR), shown per sex<sup>a</sup>.

| $D_0$                     | Women ( $n = 65$ ) |      |       |       | Men ( $n = 78$ ) |      |       |       |
|---------------------------|--------------------|------|-------|-------|------------------|------|-------|-------|
|                           | 2.5%               | 5.0% | 10.0% | 20.0% | 2.5%             | 5.0% | 10.0% | 20.0% |
| Energy                    | 193                | 48   | 12    | 3     | 278              | 69   | 17    | 4     |
| Protein                   | 332                | 83   | 21    | 5     | 413              | 103  | 26    | 6     |
| Fat                       | 860                | 215  | 54    | 13    | 1086             | 272  | 68    | 17    |
| Carbohydrate              | 243                | 61   | 15    | 4     | 308              | 77   | 19    | 5     |
| Protein <sup>b</sup>      | 217                | 54   | 14    | 3     | 201              | 50   | 13    | 3     |
| Fat <sup>b</sup>          | 485                | 121  | 30    | 8     | 605              | 151  | 38    | 9     |
| Carbohydrate <sup>b</sup> | 108                | 27   | 7     | 2     | 158              | 40   | 10    | 2     |
| SFA                       | 1303               | 326  | 81    | 20    | 1471             | 368  | 92    | 23    |
| MUFA                      | 1391               | 348  | 87    | 22    | 1518             | 380  | 95    | 24    |
| PUFA                      | 980                | 245  | 61    | 15    | 1408             | 352  | 88    | 22    |
| n-6 PUFA                  | 1077               | 269  | 67    | 17    | 1624             | 406  | 102   | 25    |
| n-3 PUFA                  | 2087               | 522  | 130   | 33    | 2002             | 500  | 125   | 31    |
| MO n-3 PUFA <sup>c</sup>  | 9511               | 2378 | 594   | 149   | 7437             | 1859 | 465   | 116   |
| Cholesterol               | 2133               | 533  | 133   | 33    | 1990             | 498  | 124   | 31    |
| Iron                      | 666                | 166  | 42    | 10    | 699              | 175  | 44    | 11    |
| Calcium                   | 1058               | 265  | 66    | 17    | 1324             | 331  | 83    | 21    |
| Carotene                  | 4088               | 1022 | 255   | 64    | 5681             | 1420 | 355   | 89    |
| Vitamin A <sup>d</sup>    | 4593               | 1148 | 287   | 72    | 7143             | 1786 | 446   | 112   |
| Vitamin D                 | 7183               | 1796 | 449   | 112   | 6266             | 1566 | 392   | 98    |
| $\alpha$ -tocopherol      | 937                | 234  | 59    | 15    | 1211             | 303  | 76    | 19    |
| Vitamin B1                | 858                | 215  | 54    | 13    | 934              | 234  | 58    | 15    |
| Vitamin B2                | 626                | 157  | 39    | 10    | 720              | 180  | 45    | 11    |
| Folate                    | 827                | 207  | 52    | 13    | 1256             | 314  | 79    | 20    |
| Vitamin C                 | 2329               | 582  | 146   | 36    | 3440             | 860  | 215   | 54    |
| SDF                       | 942                | 236  | 59    | 15    | 1342             | 335  | 84    | 21    |
| IDF                       | 746                | 187  | 47    | 12    | 957              | 239  | 60    | 15    |
| TDF                       | 648                | 162  | 40    | 10    | 875              | 219  | 55    | 14    |

Abbreviations: IDF, insoluble dietary fiber; MO n-3 PUFA, marine origin n-3 PUFA; MUFA, monounsaturated fatty acids; PUFA, polyunsaturated fatty acids; SDF, soluble dietary fiber; SFA, saturated fatty acids; TDF, total dietary fiber. <sup>a</sup> Group size of DR assuming single observation for each individual =  $1.96^2 \times [(CV_b^2 + CV_w^2)/D_0^2]$ , where  $D_0$  = the specified % deviation of group mean from group usual ("true") mean intake. All values are group size. <sup>b</sup> Value are shown as energy-dense macronutrient (% energy intake). <sup>c</sup> Sum of eicosapentaenoic acid (20:5), docosapentaenoic acid (22:5), and docosahexaenoic acid (22:6). <sup>d</sup> Sum of retinol,  $\beta$ -carotene/12,  $\alpha$ -carotene/24, and cryptoxanthin/24.

**Table S5.** Number of days required to ensure precision of energy and nutrients intake within specified correlation coefficient ( $r$ ) between observed and usual (“true”) mean intake based on dietary record (DR), shown per sex <sup>a</sup>.

|                           | Women ( $n = 65$ ) |      |      |      |      | Men ( $n = 78$ ) |      |      |      |      |
|---------------------------|--------------------|------|------|------|------|------------------|------|------|------|------|
|                           | 0.75               | 0.80 | 0.85 | 0.90 | 0.95 | 0.75             | 0.80 | 0.85 | 0.90 | 0.95 |
| Energy                    | 1                  | 2    | 3    | 5    | 10   | 1                | 2    | 3    | 4    | 10   |
| Protein                   | 2                  | 2    | 3    | 5    | 11   | 1                | 2    | 3    | 5    | 11   |
| Fat                       | 2                  | 2    | 3    | 5    | 11   | 2                | 2    | 3    | 5    | 11   |
| Carbohydrate              | 1                  | 2    | 3    | 5    | 11   | 1                | 2    | 3    | 4    | 9    |
| Protein <sup>b</sup>      | 2                  | 3    | 4    | 6    | 13   | 2                | 2    | 4    | 6    | 12   |
| Fat <sup>b</sup>          | 2                  | 2    | 3    | 5    | 11   | 1                | 2    | 3    | 5    | 11   |
| Carbohydrate <sup>b</sup> | 2                  | 2    | 3    | 6    | 12   | 1                | 2    | 3    | 5    | 10   |
| SFA                       | 2                  | 2    | 3    | 5    | 11   | 2                | 2    | 3    | 5    | 11   |
| MUFA                      | 2                  | 2    | 3    | 5    | 12   | 2                | 3    | 4    | 6    | 13   |
| PUFA                      | 2                  | 2    | 4    | 6    | 13   | 2                | 2    | 3    | 5    | 11   |
| n-6 PUFA                  | 2                  | 2    | 4    | 6    | 13   | 2                | 2    | 3    | 5    | 11   |
| n-3 PUFA                  | 2                  | 3    | 4    | 6    | 14   | 2                | 3    | 4    | 7    | 15   |
| MO n-3 PUFA <sup>c</sup>  | 2                  | 3    | 4    | 7    | 15   | 2                | 3    | 4    | 7    | 15   |
| Cholesterol               | 2                  | 3    | 5    | 8    | 17   | 2                | 2    | 4    | 6    | 13   |
| Iron                      | 1                  | 2    | 3    | 5    | 10   | 1                | 2    | 3    | 4    | 9    |
| Calcium                   | 1                  | 2    | 3    | 5    | 10   | 1                | 2    | 2    | 4    | 8    |
| Carotene                  | 1                  | 2    | 2    | 4    | 9    | 1                | 2    | 3    | 4    | 9    |
| Vitamin A <sup>d</sup>    | 1                  | 1    | 1    | 2    | 5    | 1                | 1    | 1    | 2    | 5    |
| Vitamin D                 | 2                  | 3    | 5    | 8    | 17   | 2                | 3    | 4    | 7    | 14   |
| $\alpha$ -tocopherol      | 2                  | 2    | 3    | 5    | 11   | 1                | 2    | 3    | 5    | 10   |
| Vitamin B1                | 2                  | 2    | 3    | 5    | 11   | 2                | 2    | 4    | 6    | 13   |
| Vitamin B2                | 2                  | 2    | 3    | 5    | 11   | 1                | 2    | 2    | 4    | 8    |
| Folate                    | 1                  | 2    | 2    | 4    | 9    | 1                | 2    | 2    | 4    | 8    |
| Vitamin C                 | 1                  | 2    | 3    | 5    | 10   | 1                | 1    | 2    | 3    | 7    |
| SDF                       | 2                  | 2    | 3    | 5    | 11   | 1                | 2    | 2    | 4    | 8    |
| IDF                       | 1                  | 2    | 3    | 5    | 10   | 1                | 2    | 2    | 4    | 8    |
| TDF                       | 1                  | 2    | 3    | 5    | 10   | 1                | 2    | 2    | 4    | 8    |

Abbreviations: IDF, insoluble dietary fiber; MO n-3 PUFA, marine origin n-3 PUFA; MUFA, monounsaturated fatty acids; PUFA, polyunsaturated fatty acids; SDF, soluble dietary fiber; SFA, saturated fatty acids; TDF, total dietary fiber. <sup>a</sup> Number of days of DR =  $[r^2/(1 - r^2)] \times VR$ , where  $r$  = unobservable correlation coefficient between observed and usual (“true”) mean intakes of individual and VR = within-person/between-person variance ratio ( $\sigma_w^2/\sigma_b^2$ ). All values are number of days. <sup>b</sup> Value are shown as energy-dense macronutrient (% energy intake). <sup>c</sup> Sum of eicosapentaenoic acid (20:5), docosapentaenoic acid (22:5), and docosahexaenoic acid (22:6). <sup>d</sup> Sum of retinol,  $\beta$ -carotene/12,  $\alpha$ -carotene/24, and cryptoxanthin/24.

**Table S6.** Number of days required to ensure accuracy of energy and nutrients intake with 95% confidence interval (CI) within the specified % deviation ( $D_1$ ) of an individual's usual ("true") mean intake based on dietary record (DR), shown per sex <sup>a</sup>.

| $D_1$                     | Women ( $n = 65$ ) |     |     |     | Men ( $n = 78$ ) |     |     |     |
|---------------------------|--------------------|-----|-----|-----|------------------|-----|-----|-----|
|                           | 5%                 | 10% | 20% | 30% | 5%               | 10% | 20% | 30% |
| Energy                    | 26                 | 7   | 2   | 1   | 36               | 9   | 2   | 1   |
| Protein                   | 49                 | 12  | 3   | 1   | 59               | 15  | 4   | 2   |
| Fat                       | 126                | 31  | 8   | 3   | 163              | 41  | 10  | 5   |
| Carbohydrate              | 34                 | 9   | 2   | 1   | 37               | 9   | 2   | 1   |
| Protein <sup>b</sup>      | 37                 | 9   | 2   | 1   | 32               | 8   | 2   | 1   |
| Fat <sup>b</sup>          | 72                 | 18  | 4   | 2   | 87               | 22  | 5   | 2   |
| Carbohydrate <sup>b</sup> | 17                 | 4   | 1   | 0   | 22               | 6   | 1   | 1   |
| SFA                       | 191                | 48  | 12  | 5   | 212              | 53  | 13  | 6   |
| MUFA                      | 214                | 53  | 13  | 6   | 255              | 64  | 16  | 7   |
| PUFA                      | 162                | 41  | 10  | 5   | 213              | 53  | 13  | 6   |
| n-6 PUFA                  | 177                | 44  | 11  | 5   | 235              | 59  | 15  | 7   |
| n-3 PUFA                  | 356                | 89  | 22  | 10  | 362              | 91  | 23  | 10  |
| MO n-3 PUFA <sup>c</sup>  | 1717               | 429 | 107 | 48  | 1348             | 337 | 84  | 37  |
| Cholesterol               | 407                | 102 | 25  | 11  | 329              | 82  | 21  | 9   |
| Iron                      | 91                 | 23  | 6   | 3   | 84               | 21  | 5   | 2   |
| Calcium                   | 146                | 36  | 9   | 4   | 144              | 36  | 9   | 4   |
| Carotene                  | 475                | 119 | 30  | 13  | 697              | 174 | 44  | 19  |
| Vitamin A <sup>d</sup>    | 279                | 70  | 17  | 8   | 402              | 101 | 25  | 11  |
| Vitamin D                 | 1375               | 344 | 86  | 38  | 1108             | 277 | 69  | 31  |
| $\alpha$ -tocopherol      | 135                | 34  | 8   | 4   | 169              | 42  | 11  | 5   |
| Vitamin B1                | 130                | 32  | 8   | 4   | 151              | 38  | 9   | 4   |
| Vitamin B2                | 94                 | 23  | 6   | 3   | 79               | 20  | 5   | 2   |
| Folate                    | 98                 | 25  | 6   | 3   | 132              | 33  | 8   | 4   |
| Vitamin C                 | 307                | 77  | 19  | 9   | 339              | 85  | 21  | 9   |
| SDF                       | 136                | 34  | 9   | 4   | 148              | 37  | 9   | 4   |
| IDF                       | 100                | 25  | 6   | 3   | 102              | 26  | 6   | 3   |
| TDF                       | 91                 | 23  | 6   | 3   | 96               | 24  | 6   | 3   |

Abbreviations: IDF, insoluble dietary fiber; MO n-3 PUFA, marine origin n-3 PUFA; MUFA, monounsaturated fatty acids; PUFA, polyunsaturated fatty acids; SDF, soluble dietary fiber; SFA, saturated fatty acids; TDF, total dietary fiber. <sup>a</sup> Number of days of DR =  $(1.96 \times CV_w/D_1)^2$ , where  $D_1$  = the specified % deviation of individual mean from usual ("true") mean intake. All values are number of days. <sup>b</sup> Value are shown as energy-dense macronutrient (% energy intake). <sup>c</sup> Sum of eicosapentaenoic acid (20:5), docosapentaenoic acid (22:5), and docosahexaenoic acid (22:6). <sup>d</sup> Sum of retinol,  $\beta$ -carotene/12,  $\alpha$ -carotene/24, and cryptoxanthin/24.
